# Supplementary material for: Antiparkinsonian effects of the "Radiprodil and Tozadenant" combination in MPTP-treated marmosets
Source: PubMed Central journal article supplement (PMC5576667; doi:10.1371/journal.pone.0182887), 2017-08-30
Supplement: pone.0182887.s005.pdf [file pone.0182887.s005.pdf]

## Locomotor activity

| TREATMENT       | SUBJECTS | 30 MIN | 60 MIN | 90 MIN | 120 MIN | 150 MIN | 180 MIN | 210 MIN | 240 MIN | 270 MIN | 300 MIN | 330 MIN | 360 MIN | 390 MIN | 420 MIN | 450 MIN | 480 MIN | 510 MIN | 540 MIN | 570 MIN | 600 MIN |
|-----------------|----------|--------|--------|--------|---------|---------|---------|---------|---------|---------|---------|---------|---------|---------|---------|---------|---------|---------|---------|---------|---------|
| Vehicle         | 9046     | 34     | 0      | 0      | 33      | 0       | 0       | 0       | 48      | 53      | 52      | 147     | 13      | 3       | 94      | 117     | 88      | 42      | 113     | 141     | 312     |
| Vehicle         | 9057     | 155    | 24     | 19     | 38      | 6       | 3       | 5       | 7       | 7       | 22      | 52      | 5       | 10      | 26      | 74      | 67      | 102     | 95      | 155     | 128     |
| Vehicle         | 9108     | 39     | 5      | 0      | 0       | 0       | 0       | 0       | 0       | 0       | 0       | 30      | 15      | 2       | 0       | 0       | 0       | 0       | 16      | 11      | 0       |
| Vehicle         | 1A       | 7      | 1      | 154    | 177     | 72      | 0       | 33      | 0       | 0       | 0       | 15      | 0       | 0       | 0       | 0       | 0       | 0       | 1       | 215     | 112     |
| Vehicle         | KCL12    | 44     | 30     | 46     | 36      | 20      | 13      | 16      | 15      | 19      | 12      | 28      | 9       | 24      | 26      | 7       | 18      | 20      | 24      | 55      | 97      |
| Vehicle         | KCL7     | 489    | 75     | 84     | 95      | 63      | 25      | 73      | 21      | 54      | 43      | 123     | 24      | 17      | 49      | 24      | 134     | 153     | 175     | 186     | 253     |
| Vehicle         | PX17     | 54     | 25     | 44     | 43      | 24      | 16      | 20      | 12      | 40      | 50      | 54      | 0       | 24      | 35      | 38      | 73      | 29      | 72      | 109     | 90      |
| Vehicle         | PX31     | 307    | 16     | 86     | 35      | 41      | 17      | 13      | 19      | 8       | 81      | 85      | 62      | 237     | 120     | 116     | 123     | 291     | 522     | 330     | 344     |
| Vehicle         | PX36     | 94     | 90     | 66     | 55      | 82      | 69      | 35      | 28      | 12      | 28      | 127     | 52      | 52      | 73      | 132     | 39      | 130     | 121     | 336     | 393     |
| Vehicle         | V215     | 39     | 0      | 29     | 0       | 6       | 13      | 39      | 56      | 45      | 111     | 50      | 31      | 107     | 73      | 150     | 123     | 85      | 142     | 107     | 151     |
| Vehicle         | X000     | 116    | 43     | 7      | 6       | 1       | 18      | 153     | 30      | 22      | 55      | 140     | 69      | 1       | 20      | 181     | 50      | 34      | 155     | 47      | 113     |
| Vehicle         | Y010     | 129    | 14     | 45     | 135     | 46      | 0       | 5       | 3       | 0       | 79      | 136     | 5       | 1       | 135     | 109     | 66      | 93      | 150     | 173     | 151     |
| Radiprodil 2,0  | 9046     | 48     | 43     | 252    | 208     | 119     | 153     | 189     | 327     | 55      | 197     | 105     | 83      | 195     | 242     | 135     | 271     | 303     | 157     | 223     | 354     |
| Radiprodil 2,0  | 9057     | 53     | 48     | 40     | 144     | 435     | 220     | 223     | 256     | 86      | 100     | 127     | 92      | 219     | 188     | 168     | 184     | 112     | 271     | 177     | 290     |
| Radiprodil 2,0  | 9108     | 27     | 3      | 0      | 5       | 10      | 12      | 8       | 0       | 8       | 0       | 29      | 27      | 55      | 1       | 0       | 3       | 1       | 2       | 0       | 5       |
| Radiprodil 2,0  | 1A       | 86     | 0      | 0      | 151     | 0       | 0       | 2       | 371     | 1050    | 863     | 389     | 0       | 0       | 0       | 456     | 231     | 831     | 939     | 829     | 1068    |
| Radiprodil 2,0  | KCL12    | 64     | 20     | 58     | 24      | 67      | 40      | 31      | 32      | 5       | 17      | 50      | 4       | 0       | 9       | 3       | 11      | 27      | 35      | 185     | 120     |
| Radiprodil 2,0  | KCL7     | 223    | 182    | 574    | 273     | 238     | 345     | 107     | 126     | 222     | 68      | 241     | 105     | 817     | 466     | 666     | 402     | 380     | 375     | 946     | 420     |
| Radiprodil 2,0  | PX17     | 113    | 76     | 167    | 85      | 68      | 85      | 23      | 0       | 66      | 9       | 111     | 27      | 12      | 46      | 16      | 76      | 133     | 176     | 124     | 163     |
| Radiprodil 2,0  | PX31     | 208    | 532    | 783    | 468     | 790     | 625     | 487     | 525     | 515     | 342     | 516     | 927     | 566     | 1118    | 1398    | 1677    | 3683    | 1898    | 2889    | 2129    |
| Radiprodil 2,0  | PX36     | 280    | 428    | 216    | 289     | 324     | 182     | 104     | 129     | 256     | 231     | 284     | 320     | 262     | 224     | 169     | 131     | 169     | 221     | 290     | 369     |
| Radiprodil 2,0  | V215     | 36     | 6      | 351    | 341     | 59      | 32      | 80      | 31      | 44      | 15      | 334     | 7       | 22      | 33      | 57      | 141     | 108     | 112     | 169     | 173     |
| Radiprodil 2,0  | X000     | 33     | 1      | 2      | 23      | 66      | 54      | 65      | 92      | 13      | 136     | 42      | 0       | 49      | 50      | 107     | 83      | 64      | 124     | 142     | 256     |
| Radiprodil 2,0  | Y010     | 133    | 39     | 18     | 46      | 93      | 71      | 26      | 42      | 65      | 25      | 120     | 20      | 70      | 116     | 126     | 92      | 100     | 151     | 67      | 195     |
| Tozadenant 150  | 9046     | 36     | 32     | 63     | 49      | 118     | 34      | 170     | 226     | 38      | 140     | 245     | 110     | 163     | 192     | 113     | 174     | 137     | 91      | 198     | 236     |
| Tozadenant 150  | 9057     | 26     | 10     | 0      | 0       | 0       | 20      | 29      | 23      | 15      | 16      | 72      | 111     | 143     | 119     | 177     | 24      | 363     | 278     | 89      | 477     |
| Tozadenant 150  | 9108     | 28     | 0      | 0      | 1       | 0       | 0       | 0       | 0       | 0       | 0       | 25      | 0       | 0       | 0       | 0       | 0       | 1       | 7       | 1       | 0       |
| Tozadenant 150  | 1A       | 9      | 0      | 0      | 0       | 542     | 0       | 204     | 70      | 0       | 0       | 14      | 0       | 0       | 0       | 0       | 0       | 0       | 0       | 325     | 548     |
| Tozadenant 150  | KCL12    | 33     | 13     | 20     | 19      | 29      | 16      | 29      | 22      | 14      | 17      | 66      | 69      | 41      | 34      | 46      | 23      | 36      | 70      | 74      | 126     |
| Tozadenant 150  | KCL7     | 228    | 196    | 111    | 122     | 52      | 28      | 87      | 17      | 82      | 92      | 141     | 44      | 134     | 182     | 76      | 251     | 183     | 530     | 317     | 344     |
| Tozadenant 150  | PX17     | 60     | 18     | 54     | 102     | 148     | 151     | 44      | 79      | 177     | 158     | 199     | 64      | 63      | 139     | 121     | 155     | 354     | 133     | 217     | 286     |
| Tozadenant 150  | PX31     | 315    | 182    | 596    | 228     | 497     | 95      | 246     | 49      | 260     | 157     | 623     | 185     | 184     | 121     | 365     | 217     | 303     | 384     | 240     | 393     |
| Tozadenant 150  | PX36     | 170    | 89     | 100    | 119     | 171     | 196     | 155     | 85      | 151     | 165     | 246     | 94      | 71      | 103     | 147     | 109     | 149     | 294     | 340     | 453     |
| Tozadenant 150  | V215     | 36     | 48     | 42     | 55      | 97      | 96      | 130     | 48      | 103     | 201     | 232     | 98      | 154     | 143     | 314     | 306     | 258     | 189     | 380     | 428     |
| Tozadenant 150  | X000     | 70     | 10     | 9      | 18      | 0       | 0       | 0       | 2       | 76      | 187     | 213     | 0       | 0       | 20      | 237     | 71      | 265     | 283     | 227     | 199     |
| Tozadenant 150  | Y010     | 64     | 31     | 104    | 160     | 72      | 68      | 125     | 122     | 95      | 89      | 127     | 110     | 48      | 42      | 10      | 54      | 121     | 62      | 114     | 13      |
| Toz 150 + Rad 2 | 9046     | 30     | 106    | 161    | 233     | 396     | 214     | 202     | 285     | 250     | 186     | 378     | 275     | 542     | 299     | 429     | 528     | 470     | 489     | 512     | 943     |
| Toz 150 + Rad 2 | 9057     | 45     | 95     | 515    | 628     | 425     | 343     | 575     | 303     | 279     | 263     | 254     | 418     | 519     | 782     | 586     | 397     | 584     | 850     | 856     | 643     |
| Toz 150 + Rad 2 | 9108     | 33     | 74     | 154    | 250     | 76      | 11      | 25      | 0       | 3       | 8       | 26      | 14      | 60      | 81      | 130     | 107     | 127     | 7       | 7       | 16      |
| Toz 150 + Rad 2 | 1A       | 73     | 0      | 0      | 0       | 0       | 187     | 706     | 493     | 354     | 490     | 1028    | 783     | 0       | 9       | 1451    | 614     | 1103    | 1453    | 745     | 1473    |
| Toz 150 + Rad 2 | KCL12    | 64     | 20     | 4      | 7       | 7       | 18      | 16      | 39      | 153     | 133     | 107     | 27      | 20      | 152     | 437     | 265     | 432     | 472     | 579     | 804     |
| Toz 150 + Rad 2 | KCL7     | 219    | 505    | 459    | 622     | 406     | 467     | 770     | 366     | 500     | 334     | 518     | 519     | 440     | 495     | 503     | 643     | 794     | 1239    | 1485    | 1493    |
| Toz 150 + Rad 2 | PX17     | 103    | 44     | 99     | 123     | 146     | 446     | 163     | 261     | 257     | 142     | 274     | 182     | 244     | 229     | 302     | 136     | 57      | 232     | 419     | 402     |
| Toz 150 + Rad 2 | PX31     | 312    | 259    | 808    | 676     | 526     | 718     | 712     | 569     | 406     | 389     | 384     | 635     | 1627    | 966     | 844     | 642     | 1075    | 1017    | 1704    | 1565    |
| Toz 150 + Rad 2 | PX36     | 240    | 615    | 776    | 283     | 387     | 398     | 260     | 224     | 269     | 283     | 518     | 520     | 557     | 437     | 251     | 527     | 608     | 605     | 726     | 768     |
| Toz 150 + Rad 2 | V215     | 28     | 142    | 215    | 324     | 97      | 115     | 136     | 215     | 597     | 334     | 630     | 586     | 922     | 1650    | 1690    | 1610    | 1720    | 1663    | 1665    | 1643    |
| Toz 150 + Rad 2 | X000     | 147    | 114    | 89     | 154     | 268     | 99      | 121     | 101     | 222     | 228     | 127     | 16      | 55      | 388     | 200     | 202     | 382     | 302     | 551     | 222     |
| Toz 150 + Rad 2 | Y010     | 111    | 71     | 142    | 163     | 163     | 161     | 198     | 166     | 204     | 210     | 171     | 112     | 233     | 140     | 228     | 241     | 211     | 328     | 281     | 303     |
