# Supplementary material for: Antiparkinsonian effects of the "Radiprodil and Tozadenant" combination in MPTP-treated marmosets
Source: PubMed Central journal article supplement (PMC5576667; doi:10.1371/journal.pone.0182887), 2017-08-30
Supplement: pone.0182887.s006.pdf [file pone.0182887.s006.pdf]

Disability scores

| Treatment         | Subjects | 30 MIN | 60 MIN | 90 MIN | 120 MIN | 150 MIN | 180 MIN | 210 MIN | 240 MIN | 270 MIN | 300 MIN | 330 MIN | 360 MIN | 390 MIN | 420 MIN | 450 MIN | 480 MIN | 510 MIN | 540 MIN | 570 MIN | 600 MIN |
|-------------------|----------|--------|--------|--------|---------|---------|---------|---------|---------|---------|---------|---------|---------|---------|---------|---------|---------|---------|---------|---------|---------|
| vehicle           | 9046     | 15     | 16     | 14     | 14      | 16      | 16      | 16      | 16      | 14      | 13      | 10      | 14      | 15      | 11      | 11      | 14      | 14      | 14      | 11      | 8       |
| vehicle           | 9057     | 12     | 10     | 12     | 12      | 12      | 12      | 14      | 14      | 14      | 12      | 11      | 13      | 13      | 12      | 12      | 10      | 12      | 12      | 12      | 12      |
| vehicle           | 9108     | 14     | 14     | 14     | 15      | 16      | 16      | 16      | 16      | 16      | 16      | 16      | 16      | 16      | 16      | 16      | 16      | 16      | 16      | 16      | 14      |
| vehicle           | 1A       | 12     | 12     | 5      | 6       | 7       | 11      | 12      | 12      | 12      | 12      | 12      | 12      | 12      | 12      | 12      | 12      | 12      | 13      | 2       | 6       |
| vehicle           | KCL12    | 14     | 13     | 12     | 12      | 12      | 10      | 12      | 15      | 15      | 14      | 15      | 15      | 12      | 13      | 13      | 15      | 14      | 14      | 14      | 12      |
| vehicle           | KCL7     | 10     | 11     | 12     | 12      | 12      | 15      | 14      | 11      | 11      | 12      | 12      | 14      | 11      | 11      | 10      | 13      | 13      | 14      | 15      |         |
| vehicle           | PX17     | 14     | 14     | 14     | 14      | 14      | 12      | 14      | 14      | 14      | 13      | 14      | 14      | 14      | 14      | 14      | 14      | 14      | 14      | 14      | 14      |
| vehicle           | PX31     | 11     | 11     | 11     | 11      | 11      | 14      | 14      | 14      | 14      | 14      | 15      | 15      | 15      | 15      | 14      | 12      | 11      | 11      | 11      | 11      |
| vehicle           | PX36     | 10     | 10     | 11     | 10      | 10      | 10      | 11      | 11      | 12      | 12      | 11      | 12      | 12      | 12      | 12      | 12      | 12      | 11      | 10      | 10      |
| vehicle           | V215     | 14     | 13     | 13     | 13      | 13      | 13      | 11      | 10      | 11      | 10      | 9       | 5       | 9       | 5       | 14      | 8       | 8       | 10      | 11      | 11      |
| vehicle           | X000     | 7      | 8      | 8      | 10      | 10      | 10      | 12      | 12      | 12      | 12      | 7       | 12      | 12      | 12      | 12      | 12      | 12      | 10      | 10      | 10      |
| vehicle           | Y010     | 10     | 11     | 12     | 12      | 12      | 14      | 14      | 14      | 14      | 11      | 9       | 12      | 12      | 12      | 12      | 11      | 11      | 10      | 6       | 6       |
| Radiprodil 2,0    | 9046     | 14     | 10     | 14     | 12      | 12      | 12      | 12      | 8       | 11      | 10      | 8       | 13      | 12      | 11      | 14      | 10      | 10      | 10      | 10      | 11      |
| Radiprodil 2,0    | 9057     | 12     | 12     | 12     | 10      | 10      | 10      | 5       | 5       | 9       | 10      | 7       | 10      | 10      | 4       | 4       | 7       | 5       | 7       | 7       | 7       |
| Radiprodil 2,0    | 9108     | 16     | 16     | 16     | 16      | 16      | 15      | 16      | 16      | 16      | 16      | 16      | 16      | 16      | 16      | 16      | 16      | 16      | 16      | 16      | 16      |
| Radiprodil 2,0    | 1A       | 12     | 11     | 11     | 11      | 11      | 11      | 9       | 2       | 2       | 2       | 11      | 12      | 11      | 11      | 11      | 11      | 2       | 2       | 2       | 2       |
| Radiprodil 2,0    | KCL12    | 12     | 12     | 10     | 12      | 12      | 12      | 13      | 12      | 13      | 13      | 13      | 14      | 15      | 11      | 12      | 12      | 14      | 13      | 8       | 12      |
| Radiprodil 2,0    | KCL7     | 13     | 10     | 5      | 5       | 5       | 4       | 12      | 12      | 12      | 12      | 12      | 14      | 12      | 12      | 11      | 12      | 12      | 12      | 11      | 11      |
| Radiprodil 2,0    | PX17     | 11     | 11     | 11     | 11      | 11      | 12      | 12      | 11      | 11      | 11      | 11      | 10      | 12      | 12      | 12      | 14      | 7       | 11      | 11      | 11      |
| Radiprodil 2,0    | PX31     | 11     | 4      | 2      | 2       | 2       | 2       | 7       | 7       | 6       | 6       | 7       | 5       | 5       | 5       | 5       | 5       | 5       | 2       | 2       | 2       |
| Radiprodil 2,0    | PX36     | 8      | 7      | 8      | 8       | 7       | 10      | 9       | 9       | 10      | 10      | 10      | 10      | 10      | 10      | 10      | 12      | 11      | 11      | 11      | 11      |
| Radiprodil 2,0    | V215     | 12     | 13     | 10     | 10      | 10      | 13      | 13      | 6       | 7       | 7       | 7       | 11      | 11      | 1       | 11      | 4       | 12      | 12      | 10      | 11      |
| Radiprodil 2,0    | X000     | 11     | 11     | 11     | 11      | 10      | 11      | 8       | 11      | 11      | 9       | 10      | 10      | 9       | 7       | 7       | 11      | 11      | 10      | 5       | 5       |
| Radiprodil 2,0    | Y010     | 10     | 10     | 11     | 11      | 11      | 11      | 12      | 9       | 9       | 10      | 11      | 12      | 12      | 12      | 11      | 10      | 10      | 10      | 10      | 12      |
| Tozadenant 150    | 9046     | 14     | 15     | 7      | 10      | 14      | 12      | 10      | 10      | 11      | 8       | 8       | 10      | 8       | 10      | 8       | 7       | 10      | 5       | 5       | 5       |
| Tozadenant 150    | 9057     | 14     | 14     | 14     | 14      | 14      | 14      | 14      | 13      | 12      | 13      | 9       | 10      | 10      | 10      | 10      | 11      | 10      | 12      | 10      | 11      |
| Tozadenant 150    | 9108     | 16     | 15     | 16     | 16      | 16      | 16      | 16      | 16      | 16      | 16      | 16      | 16      | 16      | 16      | 16      | 16      | 16      | 16      | 16      | 16      |
| Tozadenant 150    | 1A       | 13     | 14     | 14     | 14      | 2       | 6       | 7       | 11      | 11      | 11      | 11      | 11      | 11      | 11      | 12      | 12      | 12      | 2       | 2       | 2       |
| Tozadenant 150    | KCL12    | 13     | 13     | 11     | 12      | 12      | 12      | 12      | 12      | 12      | 12      | 9       | 12      | 12      | 12      | 12      | 12      | 12      | 12      | 12      | 10      |
| Tozadenant 150    | KCL7     | 12     | 12     | 12     | 14      | 14      | 13      | 12      | 12      | 12      | 12      | 15      | 12      | 12      | 12      | 13      | 14      | 14      | 12      | 14      | 10      |
| Tozadenant 150    | PX17     | 14     | 12     | 10     | 11      | 10      | 10      | 12      | 12      | 12      | 12      | 12      | 12      | 12      | 11      | 12      | 11      | 11      | 11      | 11      | 12      |
| Tozadenant 150    | PX31     | 13     | 12     | 12     | 12      | 12      | 13      | 10      | 11      | 10      | 10      | 10      | 10      | 10      | 10      | 14      | 12      | 14      | 13      | 14      | 14      |
| Tozadenant 150    | PX36     | 5      | 6      | 6      | 6       | 6       | 6       | 8       | 8       | 8       | 8       | 6       | 8       | 8       | 7       | 7       | 8       | 7       | 7       | 7       | 9       |
| Tozadenant 150    | V215     | 14     | 11     | 5      | 5       | 5       | 5       | 4       | 4       | 4       | 5       | 7       | 5       | 5       | 5       | 5       | 9       | 9       | 11      | 4       | 12      |
| Tozadenant 150    | X000     | 5      | 11     | 7      | 10      | 11      | 11      | 11      | 11      | 11      | 5       | 10      | 12      | 12      | 12      | 12      | 3       | 5       | 5       | 5       | 5       |
| Tozadenant 150    | Y010     | 12     | 12     | 5      | 9       | 11      | 8       | 8       | 8       | 9       | 10      | 4       | 10      | 10      | 10      | 10      | 10      | 10      | 11      | 8       | 11      |
| Rad 2,0 + Toz 150 | 9046     | 14     | 11     | 15     | 12      | 12      | 10      | 9       | 5       | 5       | 7       | 6       | 7       | 5       | 4       | 4       | 3       | 3       | 3       | 3       | 3       |
| Rad 2,0 + Toz 150 | 9057     | 11     | 10     | 2      | 5       | 10      | 3       | 5       | 4       | 5       | 5       | 5       | 7       | 7       | 8       | 6       | 6       | 6       | 4       | 2       | 2       |
| Rad 2,0 + Toz 150 | 9108     | 15     | 11     | 13     | 14      | 13      | 13      | 11      | 13      | 16      | 16      | 13      | 13      | 12      | 6       | 8       | 12      | 12      | 14      | 14      | 14      |
| Rad 2,0 + Toz 150 | 1A       | 12     | 11     | 11     | 11      | 11      | 11      | 7       | 2       | 3       | 5       | 2       | 8       | 8       | 8       | 2       | 2       | 2       | 2       | 2       | 2       |
| Rad 2,0 + Toz 150 | KCL12    | 10     | 11     | 13     | 13      | 13      | 13      | 13      | 13      | 9       | 11      | 9       | 11      | 13      | 8       | 8       | 6       | 5       | 5       | 5       | 2       |
| Rad 2,0 + Toz 150 | KCL7     | 13     | 5      | 4      | 4       | 2       | 5       | 4       | 5       | 2       | 8       | 3       | 2       | 2       | 3       | 2       | 2       | 2       | 2       | 2       | 2       |
| Rad 2,0 + Toz 150 | PX17     | 12     | 12     | 11     | 11      | 11      | 11      | 11      | 10      | 10      | 11      | 12      | 10      | 12      | 11      | 11      | 11      | 11      | 11      | 8       | 5       |
| Rad 2,0 + Toz 150 | PX31     | 10     | 10     | 2      | 2       | 2       | 2       | 3       | 4       | 4       | 5       | 3       | 2       | 2       | 5       | 4       | 4       | 4       | 4       | 4       | 4       |
| Rad 2,0 + Toz 150 | PX36     | 9      | 9      | 5      | 5       | 6       | 4       | 3       | 4       | 4       | 4       | 4       | 6       | 5       | 5       | 10      | 4       | 3       | 3       | 3       | 3       |
| Rad 2,0 + Toz 150 | V215     | 11     | 3      | 2      | 2       | 3       | 2       | 9       | 9       | 5       | 9       | 2       | 6       | 5       | 2       | 2       | 2       | 2       | 2       | 2       | 2       |
| Rad 2,0 + Toz 150 | X000     | 11     | 7      | 5      | 5       | 6       | 4       | 8       | 8       | 9       | 6       | 7       | 11      | 12      | 12      | 11      | 10      | 9       | 3       | 2       | 3       |
| Rad 2,0 + Toz 150 | Y010     | 11     | 10     | 11     | 10      | 6       | 5       | 6       | 10      | 10      | 8       | 8       | 8       | 8       | 7       | 6       | 5       | 5       | 4       | 5       | 4       |
